# Supplementary material for: Developing and implementing a family-led infection prevention bundle for hospitalized neonates
Source: Research Square preprint supplement (doi:10.21203/rs.3.rs-7695391/v1), 2025-11-07
Supplement: Supplementary file 1 [file b2eacfef3fff2e217e23d6f5.xlsx]

## Sheet: FLIP BSI_Outbreaks
Row Labels	2022-08-01	Number_Outbreak	2022-09-01	Number_Outbreak	2022-10-01	Number_Outbreak	2022-11-01	Number_Outbreak	2022-12-01	Number_Outbreak	2023-01-01	Number_Outbreak	2023-02-01	Number_Outbreak	2023-03-01	Number_Outbreak	2023-04-01	Number_Outbreak	2023-05-01	Number_Outbreak	2023-06-01	Number_Outbreak	2023-07-01	Number_Outbreak	2023-08-01	Number_Outbreak	2023-09-01	Number_Outbreak	2023-10-01	Number_Outbreak	2023-11-01	Number_Outbreak	2023-12-01	Number_Outbreak	2024-01-01	Number_Outbreak	2024-02-01	Number_Outbreak	2024-03-01	Number_Outbreak	2024-04-01	Number_Outbreak	2024-05-01	Number_Outbreak	2024-06-01	Number_Outbreak	2024-07-01	Number_Outbreak	2024-08-01
Acinetobacter baumannii																															1	1	1	1			2	2	1	1			1	1			3	3
Acinetobacter lwoffii																							2	2
Acinetobacter radioresistens																													1	1
Acinetobacter sp					1	1	1	1			4	4
C. krusei																																	2	2	1	1
C. parapsilosis
Candida albicans
Candida sp							1	1	2	2																					1	1	3	3	1	1
Chryseobacterium indologenes																																	1	1
Enterobacter aerogenes (Klebsiella aerogenes)			1	1	1	1					1	1
Enterobacter agglomerans							1	1	1	1			1	1
Enterobacter cloacae complex																																	1	1			1	1									1	1
Enterobacter sp													1	1	1	1
Enterococcus faecalis			1	1															1	1			1	1							2	2					1	1							1	1			1
Enterococcus faecium											1	1							1	1									1	1					1	1													1
Enterococcus sp			1	1	1	1	1	1									1	1	1	1							1	1									2	2	1	1	1	1	1	1
Escherichia coli	1	1					1	1			2	2							1	1			2	2											1	1			2	2	2	2			1	1	1	1
Group B Streptococcus	2	2
H. influenzae																															1	1
Klebsiella ozaene																																													1	1
Klebsiella pneumoniae			1	1			4	4	1	1	1	1	8	1	22	2	5		1	1	2	2	1	1			2	2	2	2	1	1	1	1			2	2	3		14	1	2	2	18		3		3
Leuconostoc mesenteroides																																											1	1
Listeria innowa																																							1	1
Methicillin-resistant CNS																			2	2	2	2	6	6	4	4																							2
Norcadia																																					1	1
Other Gram negative organism													2	2			2	2
Other Gram positive organism _____																					1	1
Proteus mirabilis																													1	1
Pseudomonas stutzeri															1	1
Serratia marcescens
Serratia sp
Shigella sonnei																							1	1
Sphingomonas paucimobilis	1	1																																									1	1	1	1
Staphylococcus aureus	1	1	1	1																									1	1					1	1	2	2							2	2	1	1
Streptococcus agalactiae					1	1																							1	1					1	1									1	1
Streptococcus mitis																							1	1																			1	1	1	1
Streptococcus pneumoniae																							1	1
Streptococcus pyogenes																																	1	1
Streptococcus sp.			1	1	1	1											3	3									1	1					2	2											1	1
Streptococcus verstbularis																																													1	1
Unidentified organism					1	1			1	1
Viridians streptococcus							1	1	1	1	1	1	1	1																							1	1			1	1					1	1
TOTAL	5	5	6	6	6	6	10	10	6	6	10	10	13	6	24	4	11	6	7	7	5	5	15	15	4	4	4	4	7	7	6	6	12	12	6	6	12	12	8	5	18	5	7	7	28	10	10	7	7
Total Admissions		94		85		100		80		100		81		92		106		93		82		85		71		97		93		113		119		108		107		97		111		93		108		97		93
	Outbreak	No 1	Admissions
Pre-FLIP	118	86	1069
Pilot-FLIP	39	39	637
Review-FLIP	83	46	599
Continuation-FLIP	53	48	630
Post-FLIP	175	133	1866
[truncated: 11 more columns]

## Sheet: NNU Admissions and Mortalities
NNU ADMISSIONS AND MORTALITY
Year	Month	Number of Admissions	Mortalities
2022	August	94	15
	September	85	11
	October	100	9
	Nov	80	26
	Dec	100	8
2023	January	81	16
	February	92	18
	March	106	13
	April	93	13
	May	82	15
	June	85	12
	July	71	9
	August	97	13
	September	93	14
	October	113	12
	November	119	9
	December	108	15
2024	January	107	9
	February	97	9
	March	111	15
	April	93	12
	May	108	19
	June	97	19
	July	93	12
	August	116	7
	September	90	9
	October	112	8
	November	106	10
	December	107	11
2025	January	99	5
		2935	373
	Pre-FLIP	1069	165
	Pilot-FLIP	637	72
	Review-FLIP	599	86
	Continuation-FLIP	630	50
	Post-FLIP	1866	208
	Oct24 Post	1554	182
	NEW Continuation	1229	136
	Oct24 Continuation	917

## Sheet: Hand Hygiene
FLIP PILOT HAND HYGIENE COMPLIANCE AUGUST 2023 TO JANUARY 2024
MONTH	NNU ADMISSIONS	NO OF MOTHERS ASSESSED	CRITERION ASSESSED (13 observations per Audit tool)	COMPLIANT	COMPLIANCE RATE	%
FLIP PILOT PERIOD
AUGUST	97	13	169	123	123/169	0.727811
SEPTEMBER	93	23	299	241	241/299	0.80602
OCTOBER	113	13	169	136	136/169	0.804734
NOVEMBER	119	5	65	34	34/65	0.523077
DECEMBER	108	11	143	110	110/143	0.769231
2024 JANUARY	107	22	286	203	203/286	0.70979
TOTALS	637	87	1131	847	847/1131	0.748895
FLIP REVISION PERIOD HAND HYGIENE COMPLIANCE FEBRUARY TO JULY 2024
FLIP REVISION PERIOD	NNU ADMISSIONS	NO OF MOTHERS ASSESSED	CRITERION ASSESSED (13 observations per Audit tool)	COMPLIANT	COMPLIANCE RATE	%
FEBRUARY	97	34	442	307	307/442	0.69457
MARCH	111	25	325	245	245/235	0.753846
APRIL	93	47	611	525	525/611	0.859247
MAY	108	46	598	379	379/598	0.633779
JUNE	97	41	533	382	382/533	0.716698
JULY	93	43	559	472	472/559	0.844365
TOTALS	599	236	3068	2310	2310/3068	0.752934
FLIP IMPLEMENTATION PERIOD		AUGUST 2024 TO JANUARY 2025
Month	NNU Admissions	Mothers Assessed	Expected Compliance	Compliant	Compliance Rate	%
AUGUST	116	34	442	272	272/442	0.615385
SEPTEMBER	90	36	468	254	254/468	0.542735
OCTOBER	112	48	624	415	415/624	0.665064
NOVEMBER	106	50	650	493	493/650	0.758462
DECEMBER	107	11	143	128	128/143	0.895105
JANUARY	99	51	663	493	493/663	0.74359
TOTALS	630	230	2990	2055	2055/2990	0.687291

## Sheet: CHG Compliance
NNU CHG COMPLIANCE
FLIP IMPLEMENTATION PERIOD		AUGUST 2023 TO JANUARY 2024
Month	NNU Admissions	CHG Eligible Babies	Babies CHG Cleansed	Compliance Rate	%
AUGUST	97	205	90	90/205	0.439024
SEPTEMBER	93	199	127	127/199	0.638191
OCTOBER	113	245	182	182/245	0.742857
NOVEMBER	119	266	101	101/266	0.379699
DECEMBER	108	167	79	79/167	0.473054
JANUARY	107	265	166	166/265	0.626415
TOTALS	637	1347	745	745/1347	0.553081
FLIP IMPLEMENTATION PERIOD		FEBRUARY TO JULY 2024
Month	NNU Admissions	CHG Eligible Babies	Babies CHG Cleansed	Compliance Rate	%
FEBRUARY	97	205	183	183/205	0.892683
MARCH	111	195	187	187/195	0.958974
APRIL	93	207	205	205/207	0.990338
MAY	108	227	214	214/227	0.942731
JUNE	97	193	183	183/193	0.948187
JULY	93	188	177	177/188	0.941489
TOTALS	599	1215	1149	1149/1215	0.945679
FLIP IMPLEMENTATION PERIOD		AUGUST 2024 TO JANUARY 2025
Month	NNU Admissions	CHG Eligible Babies	Babies CHG Cleansed	Compliance Rate	%
AUGUST	116	226	203	203/226	0.89823
SEPTEMBER	90	326	301	301/326	0.923313
OCTOBER	112	426	394	394/426	0.924883
NOVEMBER	106	0	0		#DIV/0!
DECEMBER	107	0	0		#DIV/0!
JANUARY	99	0	0		#DIV/0!
TOTALS	630	978	898	898/978
CHG not done from November to January due to unavailability of stock

## Sheet: Delivery Mode
Month	Caesarean	Vaginal
February	9.3	2.6
March	9.4	2.1
Aprl	9.7	2.3
May	10	2.3
June	10.9	2.6
July	9.5	2.3
August	8.5	1.6
September	10.9	1.9
October	9	1.7
November	10.7	1.3
December	10.4	1.1
January	9.6	1.2

## Sheet: Sweeps Colonisation
Month	Ward census	ESBL skin	ESBL rectal	ESBL both/either		CRE skin	CRE rectal	CRE both/either		Acineto Skin	Acineto rectal	Acineto both/either
2022-10-01	20	8	10	13						4	7	10
2022-11-01	34	6	19	20						2	7	8
2022-12-01	68	14	30	32						8	20	25
2023-01-01	70	33	52	54						17	14	22
2023-02-01	67	16	43	46						20	31	38
2023-03-01	46	3	9	10		0	0	0		1	8	8
2023-04-01	67	6	21	23		0	4	4		6	19	20
2023-05-01	52	14	30	34		2	2	3		7	15	17
2023-06-01	57	11	21	22		1	1	2		12	12	16
2023-07-01	74	4	24	25		0	3	3		4	14	14
2023-08-01	57	6	19	22		0	1	1		6	11	14
2023-09-01	61	16	36	41		1	1	2		18	25	29
2023-10-01	67	15	29	30		0	2	2		20	24	30
2023-11-01	61	11	26	28		1	3	4		13	24	28
2023-12-01	26	6	14	14		1	5	5		8	11	12
2024-01-01	67	9	22	23		3	9	9		13	16	22
2024-02-01	57	15	27	31		2	5	5		14	24	27
2024-03-01	57	26	39	41		0	2	2		25	36	39
2024-04-01	81	25	41	48		1	2	2		30	36	45
2024-05-01	58	26	32	34		0	1	1		30	29	37
2024-06-01	65	22	29	34		0	1	1		21	27	34
2024-07-01	44	10	18	20		1	1	1		16	20	23
2024-08-01	59	28	36	42		0	6	6		19	32	37
2024-09-01	63	17	37	39		0	3	3		21	37	40
2024-10-01	81	17	46	49		0	5	5		24	38	44
Pre-FLIP	555	115	259	279		3	10	12		81	147	178
Post-FLIP	904	249	451	496		10	47	49		278	390	461
Totals	1459			775				61				639
Pilot	339	63	146	158		6	21	23		78	111	135
Revision	362	124	186	208		4	12	12		136	172	205
Implementation	203	62	119	130		0	14	14		64	107	121
NEW Continuous (revision + implementation)	565	186	305	338		4	26	26		200	279	326
